# Supplementary material for: Assembling phosphorene flexagons for 2D electron-density-guided nanopatterning and nanofabrication
Source: Royal Society of Chemistry journal article supplement (doi:10.1039/c7nr03377j), 2017-01-01
Supplement: c7nr03377j1.pdf [file c7nr03377j1.pdf]

## Supporting Information

### Assembling Phosphorene Flexagons for 2D

### Electron-density-guided Nanopatterning and Nanofabrication

Kisung Kang,<sup>1,2,\*</sup> Woosun Jang,<sup>1,\*</sup> and Aloysius Soon<sup>1,†</sup>

<sup>1</sup>*Department of Materials Science and Engineering,  
Yonsei University, Seoul 03722, Korea*

<sup>2</sup>*Department of Materials Science and Engineering,  
University of Illinois at Urbana-Champaign, IL 61801, USA*

(Dated: May 12, 2017)

#### Brief computational setup

We perform first-principles density-functional theory (DFT) calculations with the projector-augmented wave (PAW) method as implemented in the Vienna *Ab initio* Simulation Package (VASP). In our DFT calculations, periodic boundary conditions are enforced with a vacuum region of 15 Å along the out-of-plane direction for all 2D models used in this work. A planewave kinetic energy cutoff of 500 eV is employed, and for geometry optimization, the semi-local approximation to the exchange-correlation functional due to Perdew, Burke, and Ernzerhof (PBE) is used. To achieve a higher precision in our electronic band structure calculations, we have adopted the HSE06 hybrid DFT functional instead. A  $\Gamma$ -centered  $\mathbf{k}$ -point grid of a reciprocal space sampling distance of  $0.2 \text{ \AA}^{-1}$  and  $0.15 \text{ \AA}^{-1}$  are used for all geometry optimization and electronic band structure calculations, respectively. All geometries are relaxed until the forces do not vary more than and  $0.02 \text{ eV \AA}^{-1}$ .

TABLE S1. The calculated elastic stiffness constants (in GPa) of selected phosphorene flexagons.

| Structure               | $C_{11}$ | $C_{12}$ | $C_{22}$ | $C_{44}$ | Born-Huang criteria |
|-------------------------|----------|----------|----------|----------|---------------------|
| <i>he</i> -2F- <i>t</i> | 17.10    | -1.33    | 61.75    | 16.03    | ○                   |
| <i>he</i> -3F- <i>t</i> | 27.08    | 12.25    |          |          | ○                   |
| <i>he</i> -4F- <i>t</i> | 63.29    | -7.42    |          | 5.74     | ○                   |
| <i>ho</i> -6F- <i>t</i> | 27.71    | 18.51    |          |          | ○                   |
| $\alpha$ -P             | 24.31    | 17.48    | 103.95   | 22.65    | ○                   |

\* These authors contributed equally to this work.

† Corresponding author. E-mail: aloysius.soon@yonsei.ac.kr

|    | Teller ( <i>t</i> )                                                                 | Schüssel ( <i>s</i> )                                                                |
|----|-------------------------------------------------------------------------------------|--------------------------------------------------------------------------------------|
| 2F | 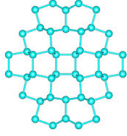   |    |
|    |    |    |
| 3F |    |    |
|    |    |    |
| 4F |   |   |
|    |  |  |
| 6F |  |  |
|    |  |  |

FIG. S1. (Color online) Atomic structure of unit phosphorene nanoflakes with different symmetry (2-, 3-, 4-, and 6-fold) and shape (flat- (*t*) and bowl-shaped (*s*)), which used to build phosphorene flexagons.

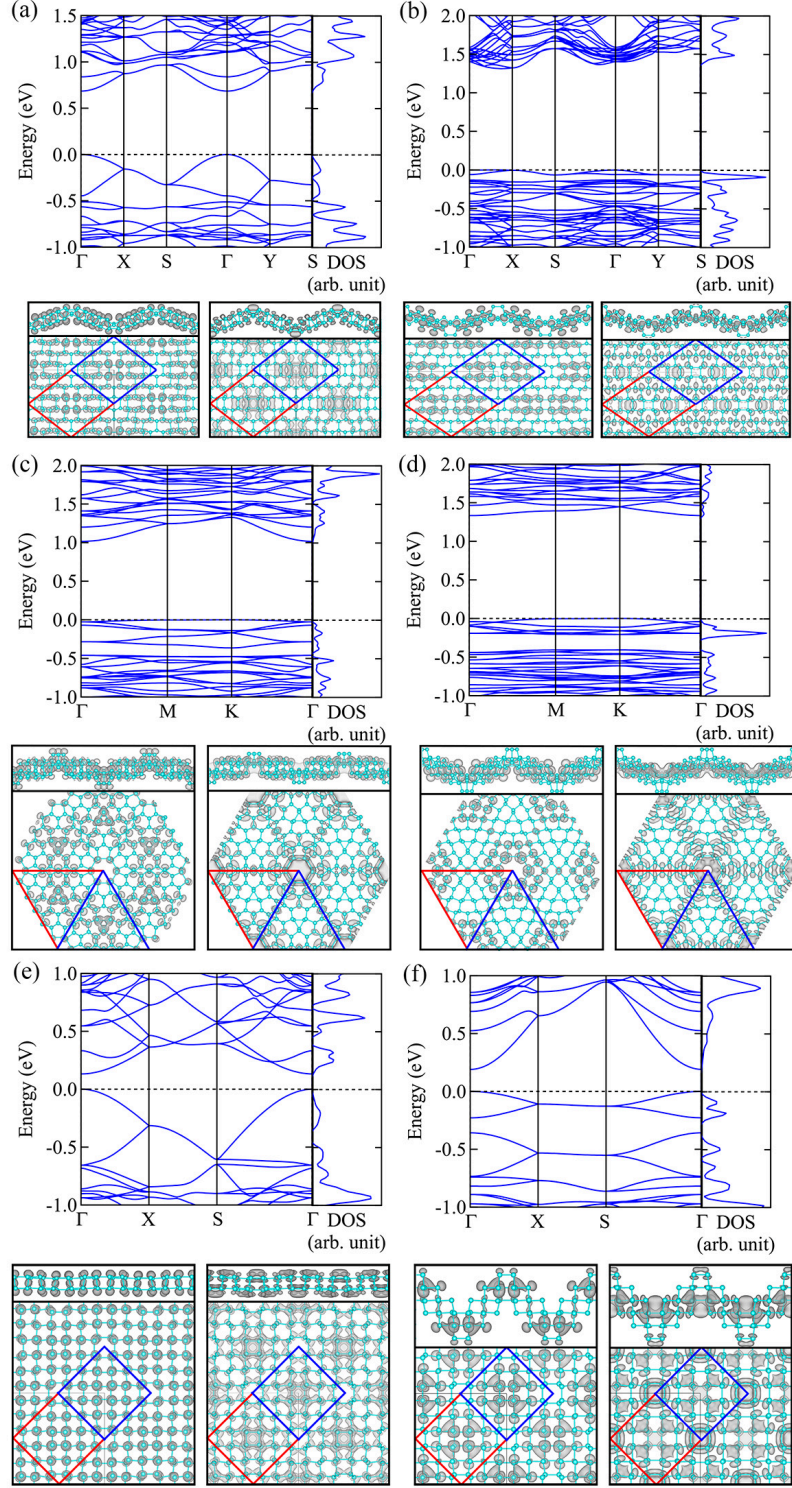

FIG. S2. (Color online) Calculated band structures, density-of-states, and partial electron densities at valence band edge (bottom-left) and conduction band edge (bottom-right) of *he*-flexagons; (a) *he*-2F-*t*, (b) *he*-2F-*s*, (c) *he*-3F-*t*, (d) *he*-3F-*s*, (e) *he*-4F-*t*, and (f) *he*-4F-*s*. Red and blue lines are to show different vertical arrangement of adjacent flakes.

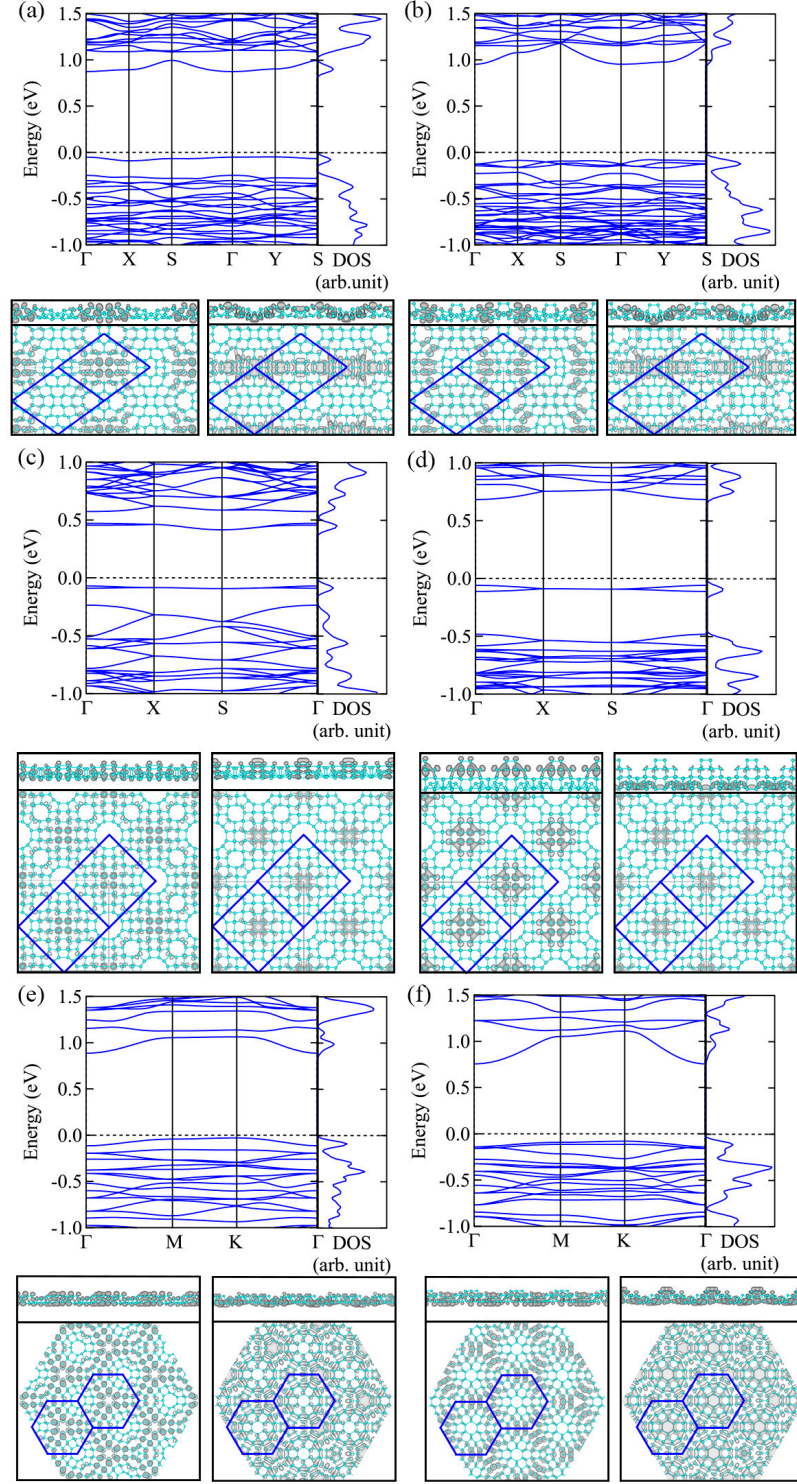

FIG. S3. (Color online) Calculated band structures, density-of-states, and partial electron densities at valence band edge (bottom-left) and conduction band edge (bottom-right) of *ho*-flexagons; (a) *ho*-2F-*t*, (b) *ho*-2F-*s*, (c) *ho*-4F-*t*, (d) *ho*-4F-*s*, (e) *ho*-6F-*t*, and (f) *ho*-6F-*s*. Blue lines are to show same vertical arrangement of adjacent flakes.



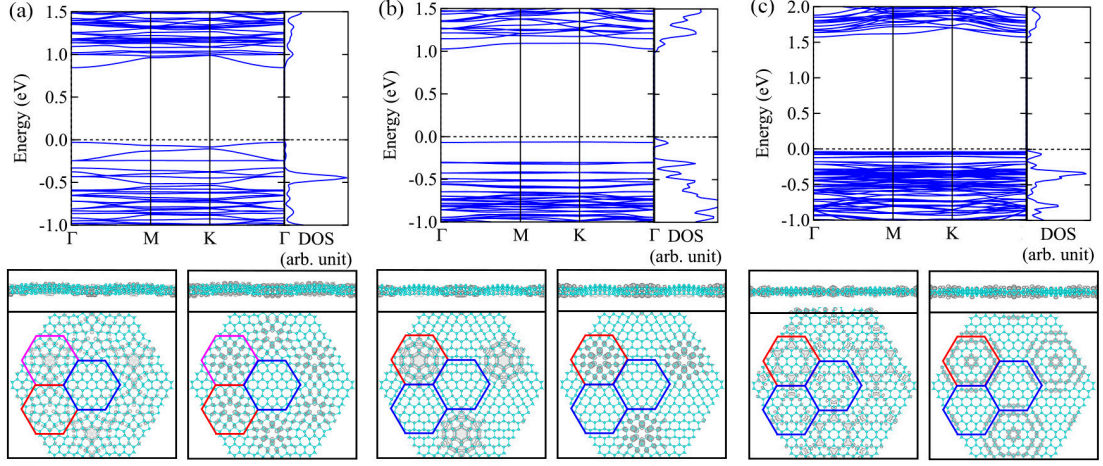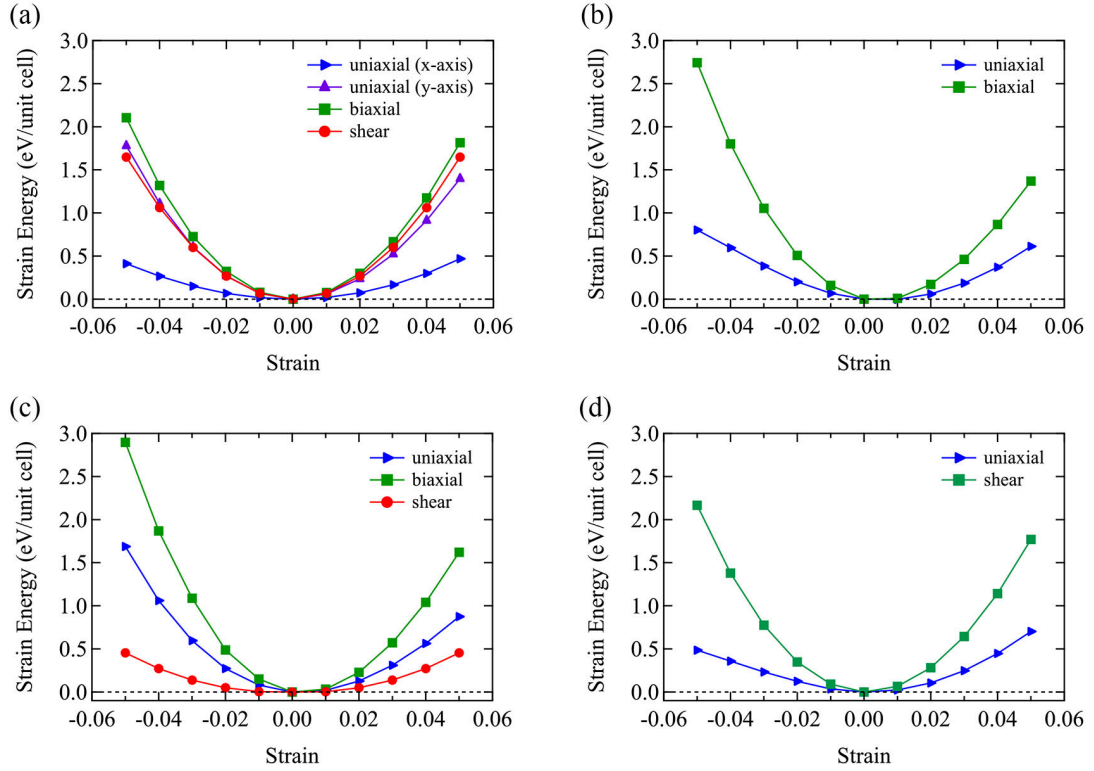

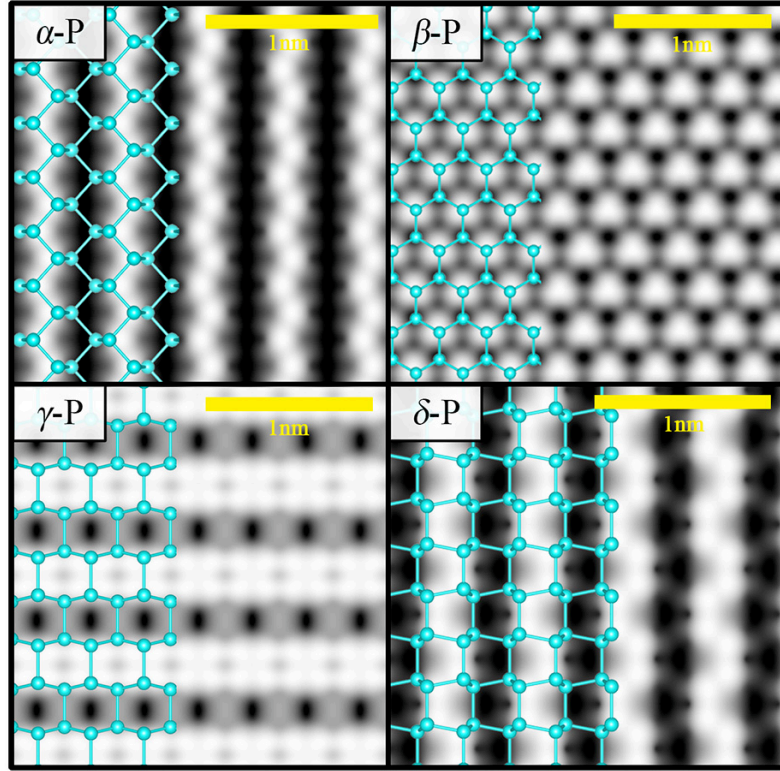

FIG. S6. (Color online) Simulated STM images and corresponding atomic positions of normal phosphorene phases; (a)  $\alpha$ -, (b)  $\beta$ -, (c)  $\gamma$ -, and (d)  $\delta$ -P.
